# Supplementary material
Source: PubMed Central journal article supplement (PMC4833579)

Figure 2a

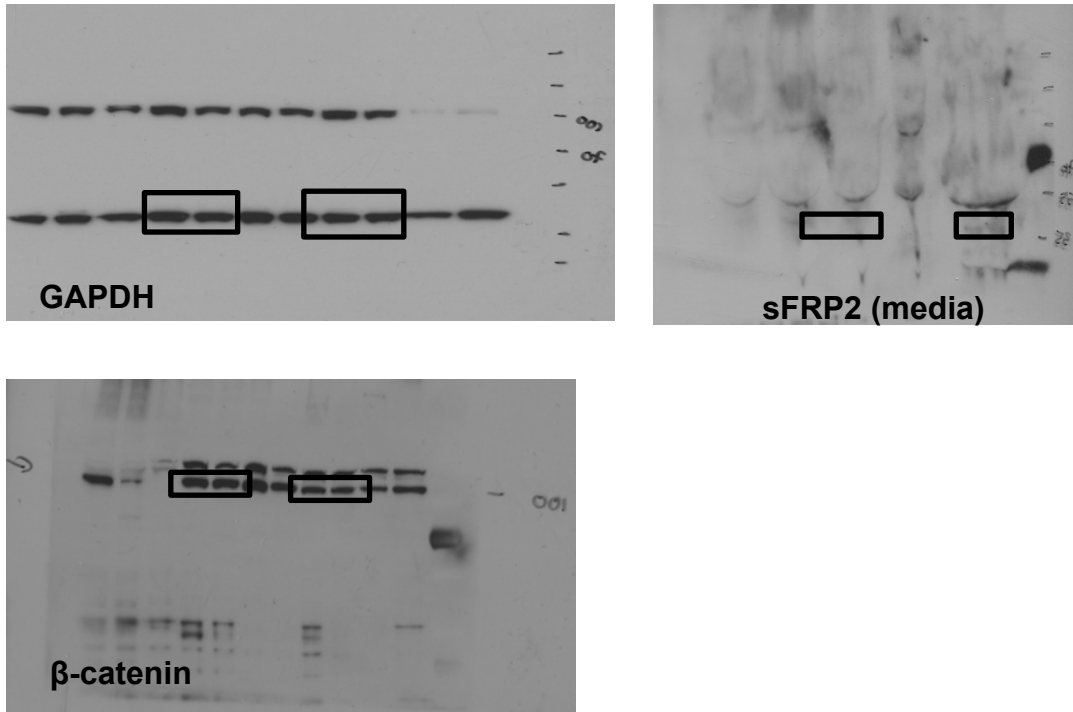

Figure 2g

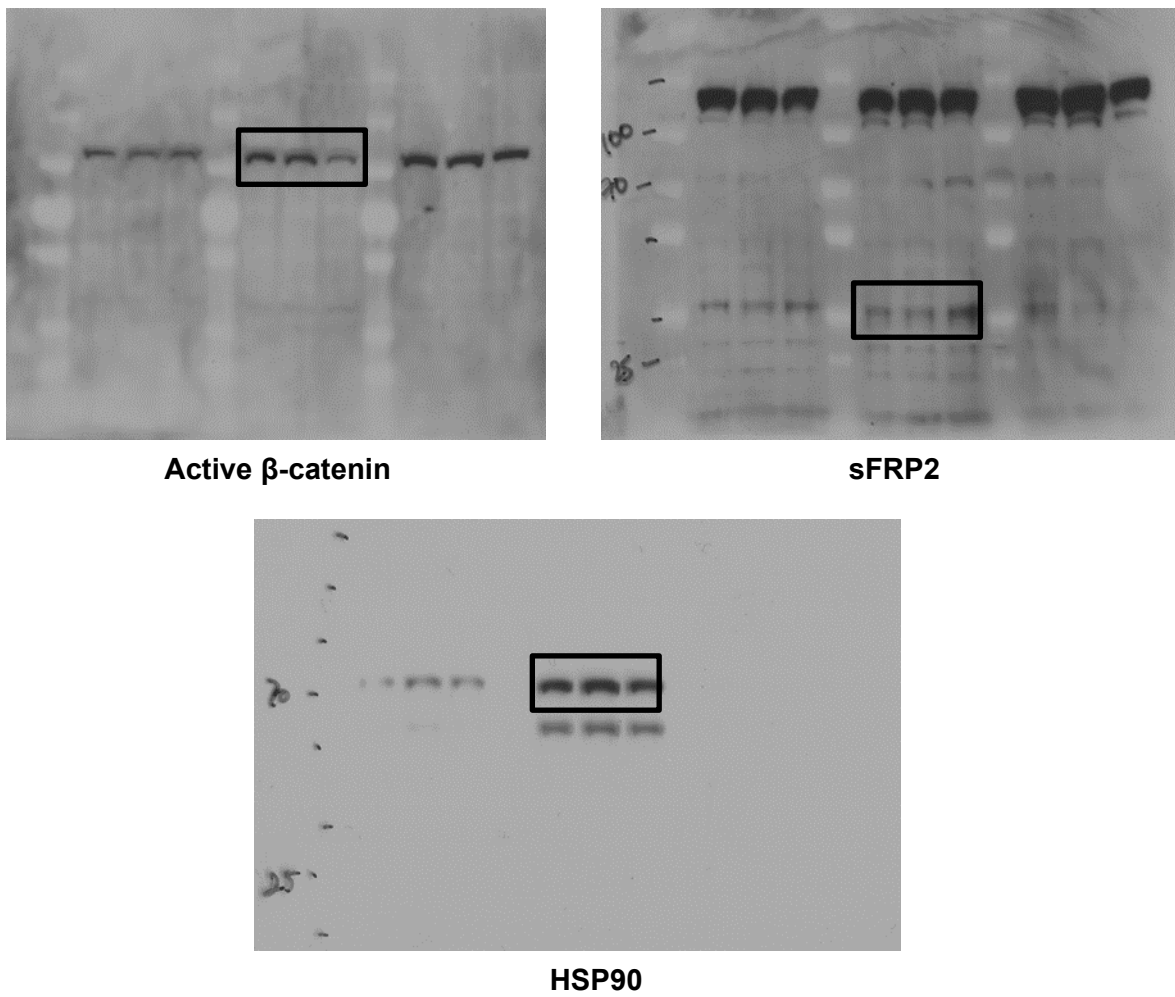

Figure 3a

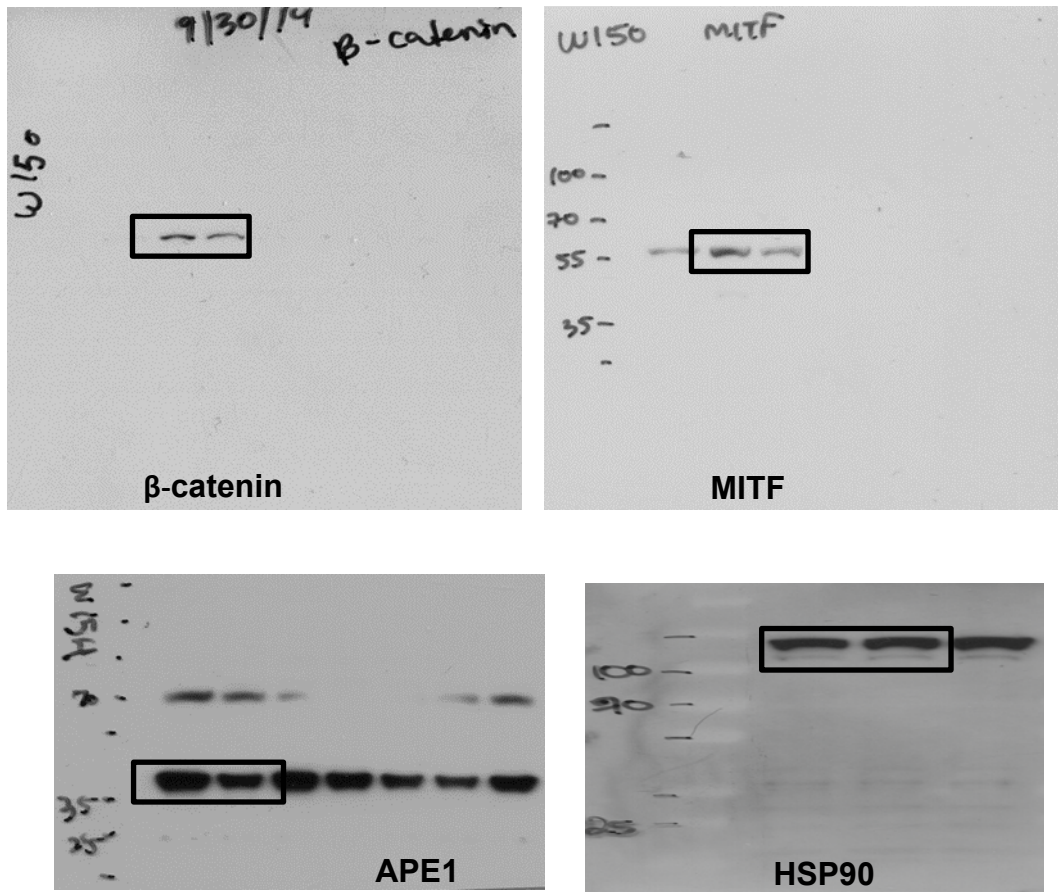

Figure 3e

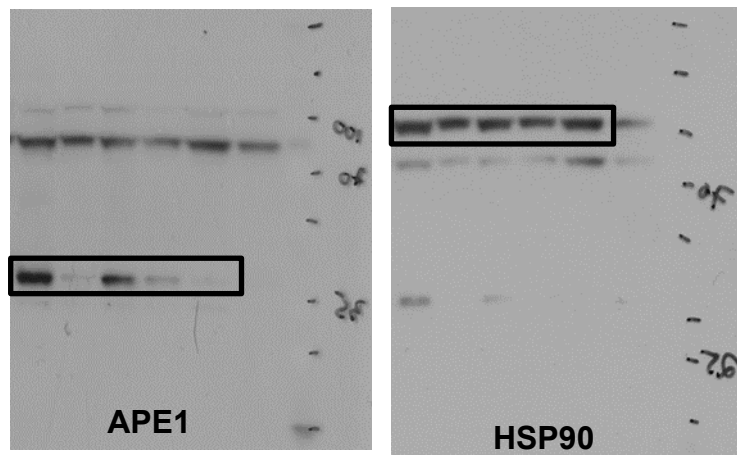

Figure 4f

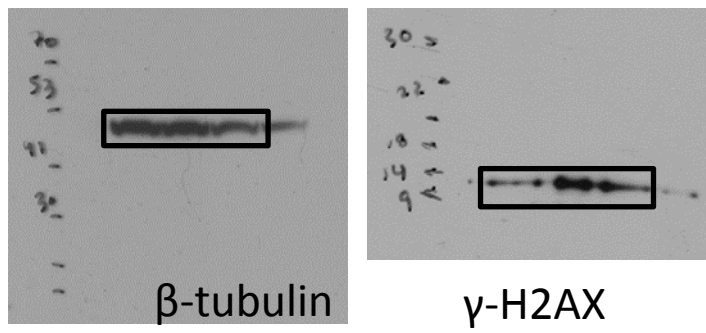

Figure 4g

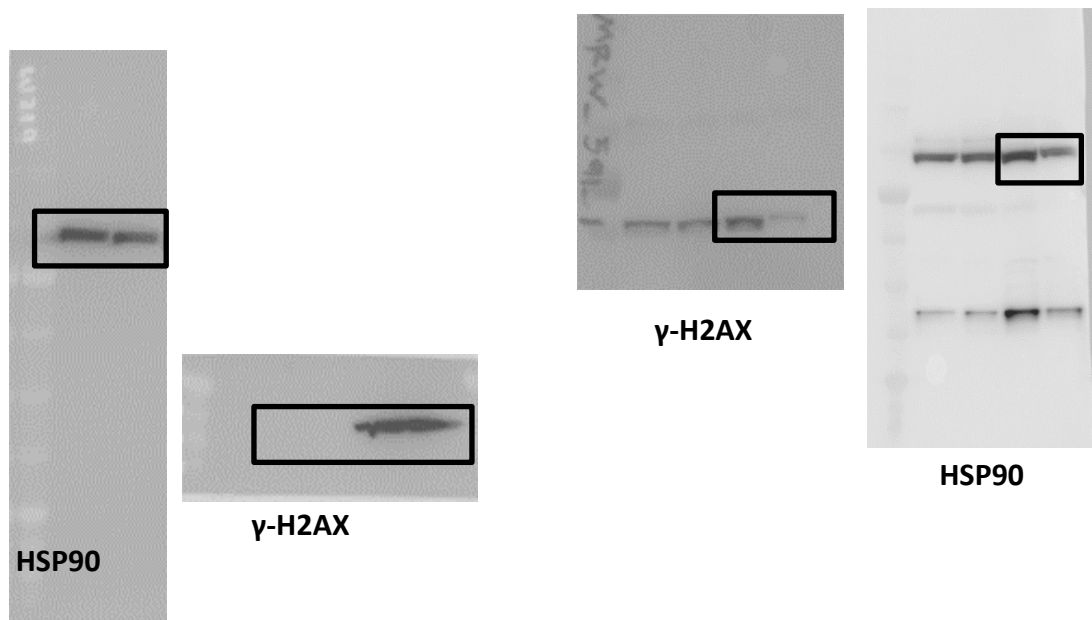

Extended data 5b

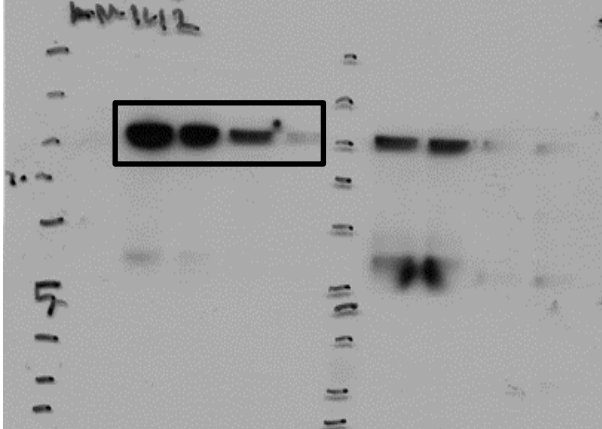

GAPDH

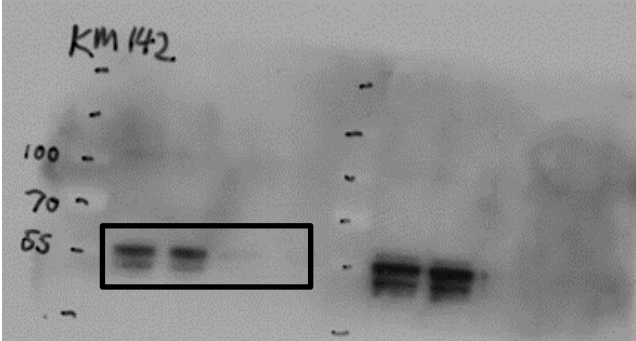

$\beta$ -tubulin

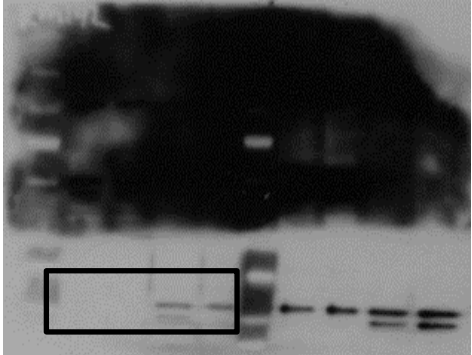

Histone H3

Extended data 6b

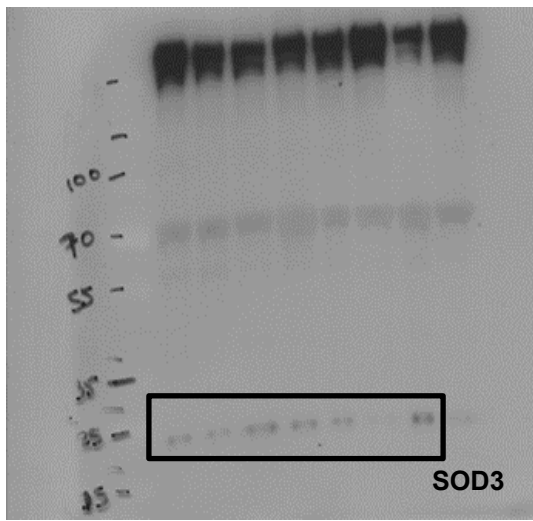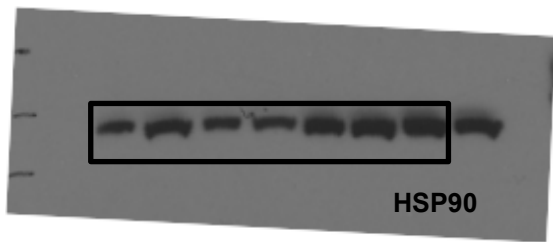

Extended data 6c

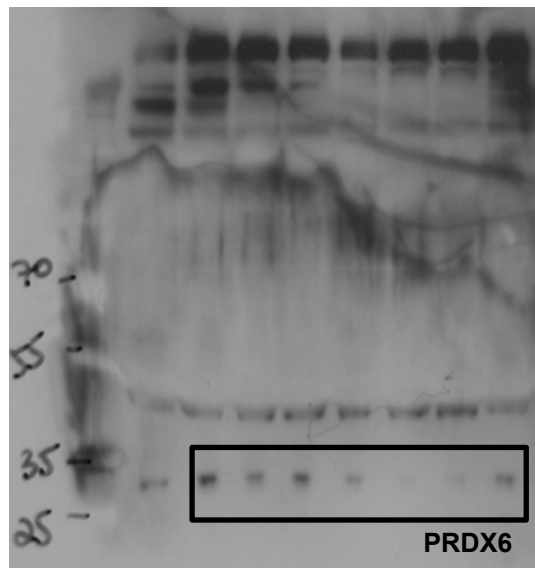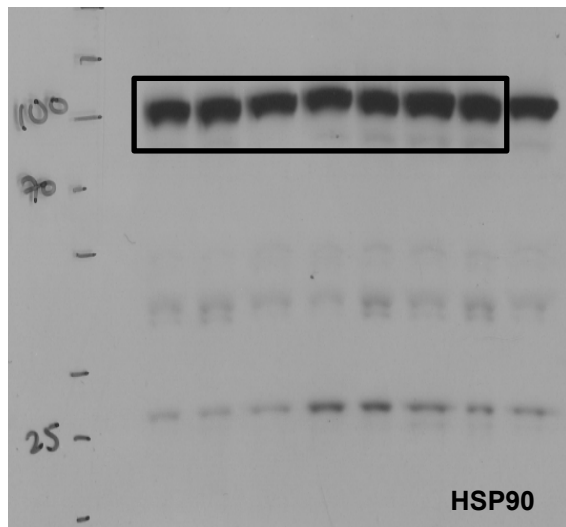

Extended data 8e

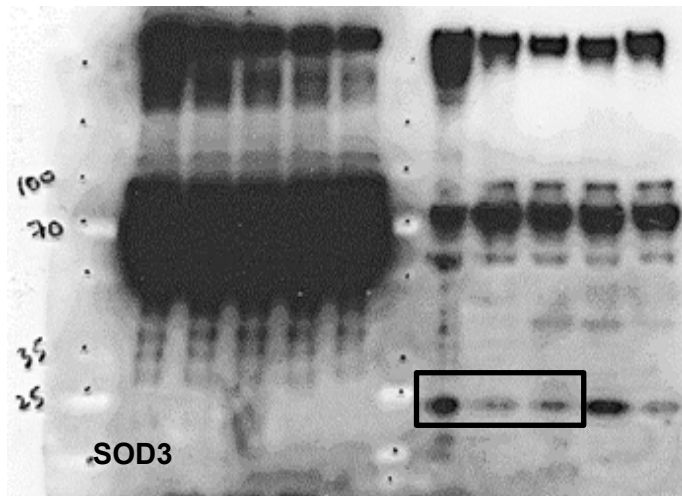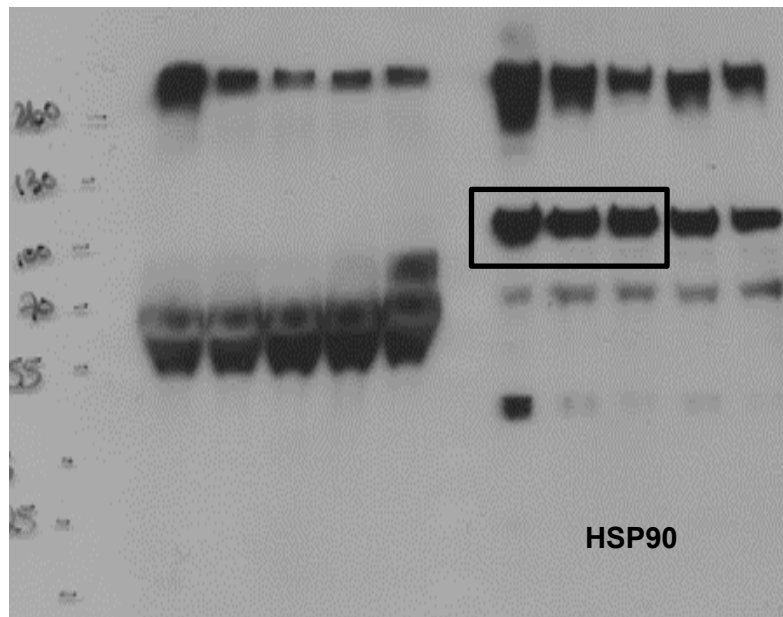

### Extended data 10b

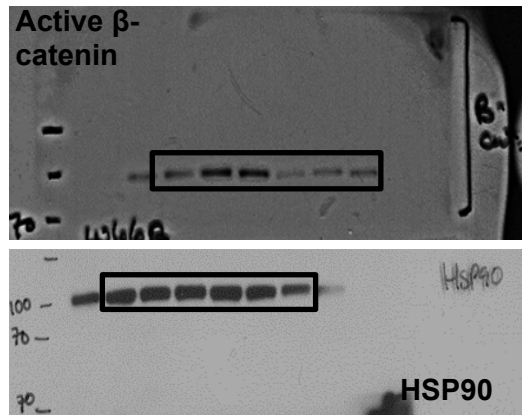

### Extended data 10c

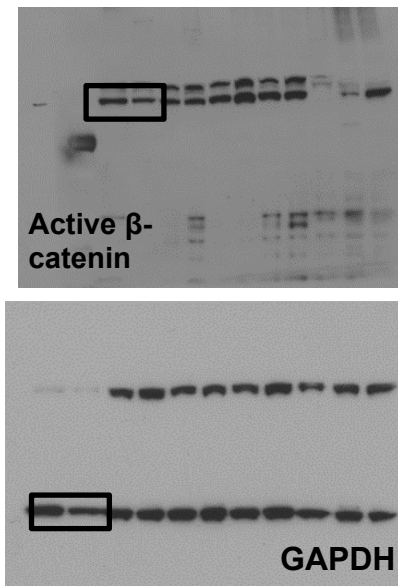

Supplement: NIHMS757165-supplement-3.pdf [file NIHMS757165-supplement-3.pdf]
